# Supplementary material for: Sealer: a scalable gap-closing application for finishing draft genomes
Source: PubMed Central journal article supplement (PMC4515008; doi:10.1186/s12859-015-0663-4), 2015-07-25
Supplement: 12859_2015_663_MOESM2_ESM.pdf [file 12859_2015_663_MOESM2_ESM.pdf]

**Supplemental table S1.** In-depth gap sequence analysis of the *E. coli* K12 genome.

| Gap ID     | Original assembly gap length (bp) | Sealer gap length (bp) | GapCloser gap length (bp) | GapFiller gap length (bp) |
|------------|-----------------------------------|------------------------|---------------------------|---------------------------|
| 1469_246   | 50                                | 1                      | -                         | 1                         |
| 1470_4783  | 50                                | -8                     | -8                        | -8                        |
| 1470_5078  | 50                                | -9                     | -9                        | -9                        |
| 1471_1044  | 50                                | 10*                    | -                         | 8                         |
| 1472_386   | 50                                | -4                     | -                         | -4                        |
| 1473_1283  | 50                                | 7**                    | -                         | -                         |
| 1476_1501  | 50                                | 0                      | -                         | 0                         |
| 1477_12528 | 50                                | 8                      | -                         | 8                         |
| 1478_5345  | 69                                | -11                    | -                         | -11                       |
| 1479_429   | 50                                | 391                    | -                         | -24 <sup>†</sup>          |
| 1480_12947 | 50                                | -1                     | -                         | -1                        |
| 1481_446   | 50                                | 8 <sup>‡</sup>         | -                         | 8 <sup>‡</sup>            |
| 1482_9410  | 50                                | 958 <sup>§</sup>       | -                         | -                         |
| 1483_3927  | 50                                | -17                    | -                         | -17                       |
| 1484_541   | 50                                | -                      | -                         | -                         |
| 1485_676   | 50                                | -22                    | -                         | -22                       |
| 1487_3816  | 50                                | -43                    | -                         | -43                       |
| 1488_3131  | 50                                | 1                      | -                         | 1                         |

*A negative number indicate an overlap at the gap location. Absence of a value indicate that the particular gap was not fully closed.*

*\*2 insertions, 1 ambiguity code*

*\*\* 2 ambiguity codes*

*† 169/176 aligned bases, 96% similarity*

*‡ 1 mismatch, 99.52% similarity*

*§ 1 ambiguity code*

*All results aligned to the reference genome with 100% similarity unless otherwise stated.*
