# Supplementary material for: Sealer: a scalable gap-closing application for finishing draft genomes
Source: PubMed Central journal article supplement (PMC4515008; doi:10.1186/s12859-015-0663-4), 2015-07-25
Supplement: 12859_2015_663_MOESM3_ESM.pdf [file 12859_2015_663_MOESM3_ESM.pdf]

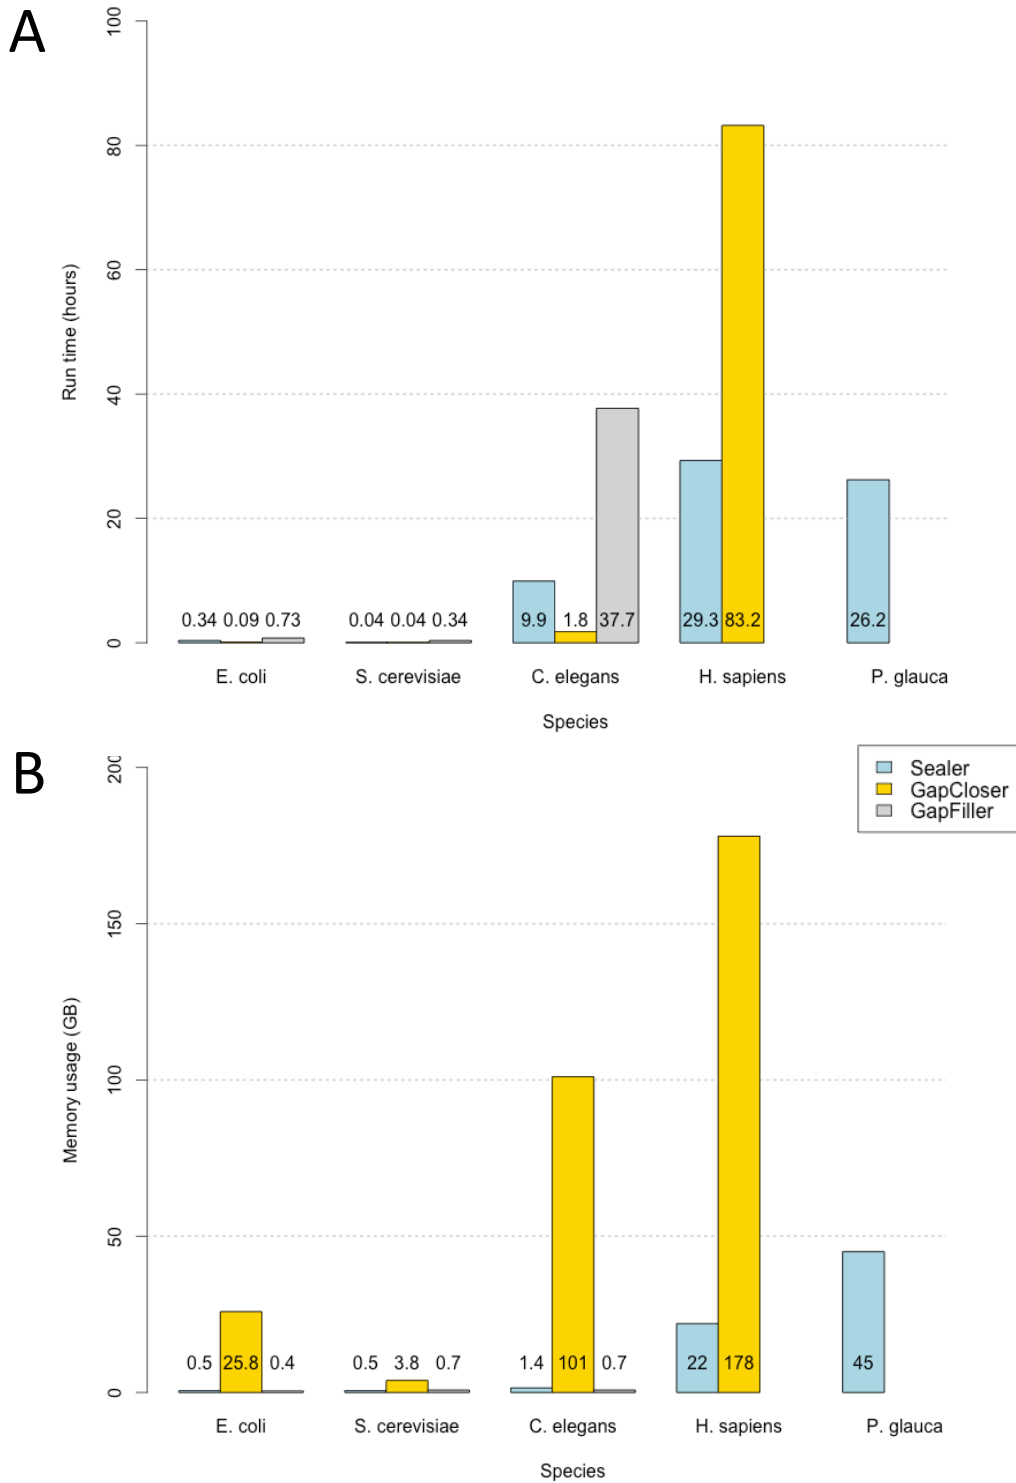

**Supplemental figure S2. Compute resource required by Sealer, GapCloser and GapFiller for closing gaps in the *E.coli* K12, *S. cerevisiae*, *C. elegans*, *H. sapiens* and *P. glauca* draft genome assemblies. A) Run time B) Memory usage.**
