# Supplementary material for: Sealer: a scalable gap-closing application for finishing draft genomes
Source: PubMed Central journal article supplement (PMC4515008; doi:10.1186/s12859-015-0663-4), 2015-07-25
Supplement: 12859_2015_663_MOESM4_ESM.pdf [file 12859_2015_663_MOESM4_ESM.pdf]

**Supplemental table S2.** QCAST analysis of gap-closed *E. coli*, *S. cerevisiae* and *C. elegans* draft genome assemblies.

|                                    | <i>E. coli</i> K12 (4,686,137 bp) |              |             |              | <i>S. cerevisiae</i> S288c (12,071,326 bp) |              |           |              | <i>C. elegans</i> Bristol N2 (100,272,607 bp) |              |           |              |
|------------------------------------|-----------------------------------|--------------|-------------|--------------|--------------------------------------------|--------------|-----------|--------------|-----------------------------------------------|--------------|-----------|--------------|
|                                    | Original assembly                 | Sealer       | GapCloser   | GapFiller    | Original assembly                          | Sealer       | GapCloser | GapFiller    | Original assembly                             | Sealer       | GapCloser | GapFiller    |
| Number of sequences*               | 535                               | <b>526</b>   | 534         | 527          | 1750                                       | <b>1682</b>  | 1737      | 1687         | 5846                                          | 4701         | 4970      | <b>4179</b>  |
| Largest sequence (bp)              | 66338                             | 66338        | 66338       | 66338        | 59854                                      | 59854        | 59854     | 59854        | 384642                                        | 1349218      | 1349228   | 762554       |
| N50 (bp)                           | 14251                             | <b>14601</b> | 14251       | <b>14601</b> | 10397                                      | <b>10724</b> | 10429     | <b>10724</b> | 39508                                         | 52267        | 48508     | <b>59358</b> |
| NG50 (bp)                          | 13120                             | <b>13190</b> | 13120       | 13150        | 9497                                       | <b>9963</b>  | 9626      | 9934         | 41165                                         | 55074        | 51773     | <b>59732</b> |
| Mis-assemblies                     | <b>2</b>                          | 3            | <b>2</b>    | <b>2</b>     | <b>14</b>                                  | 15           | <b>14</b> | <b>14</b>    | <b>231</b>                                    | 440          | 370       | 362          |
| N's per 100 kbp                    | 0.00                              | 0.09         | 0.00        | 0.00         | 1.25                                       | 1.45         | 0.00      | 0.00         | 1.54                                          | 5.58         | 0.00      | 0.00         |
| Mis-match per 100 kbp <sup>1</sup> | <b>2.01</b>                       | 2.67         | <b>2.01</b> | 3.06         | 81.02                                      | 82.19        | 82.53     | <b>80.60</b> | <b>15.53</b>                                  | 22.24        | 22.81     | 20.63        |
| Complete genes                     | 3765                              | <b>3787</b>  | 3771        | 3779         | 5089                                       | <b>5149</b>  | 5103      | 5122         | 47405                                         | <b>47743</b> | 47645     | 46269        |

\* All statistics are based on sequences of size  $\geq 500$

<sup>1</sup> Sealer introduces IUPAC ambiguity codes when a base is uncertain, which is assessed as a mismatch by QCAST
