# Supplementary material for: Sealer: a scalable gap-closing application for finishing draft genomes
Source: PubMed Central journal article supplement (PMC4515008; doi:10.1186/s12859-015-0663-4), 2015-07-25
Supplement: 12859_2015_663_MOESM5_ESM.pdf [file 12859_2015_663_MOESM5_ESM.pdf]

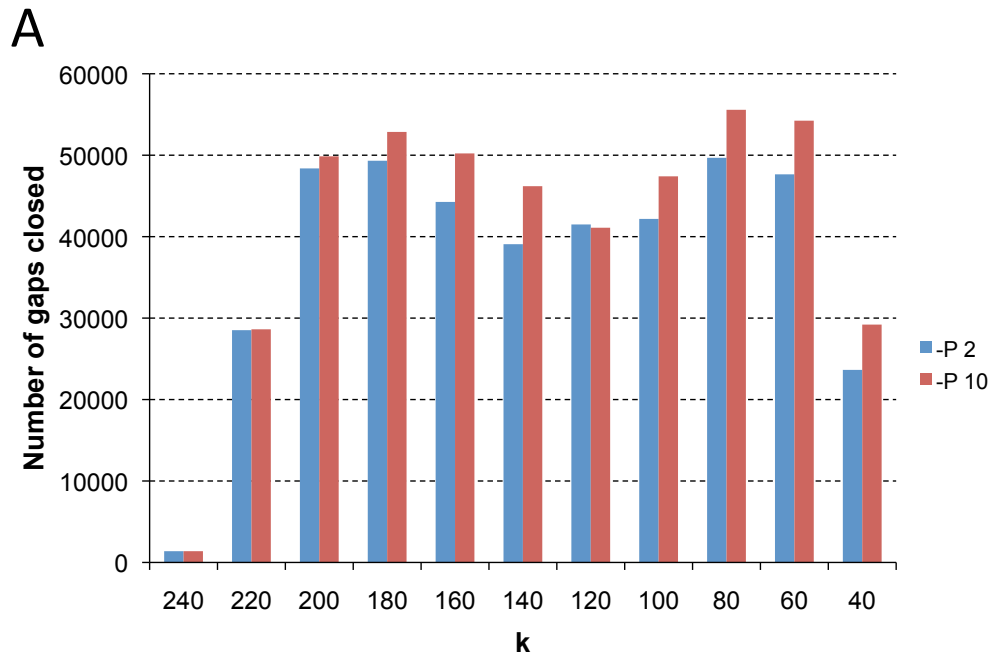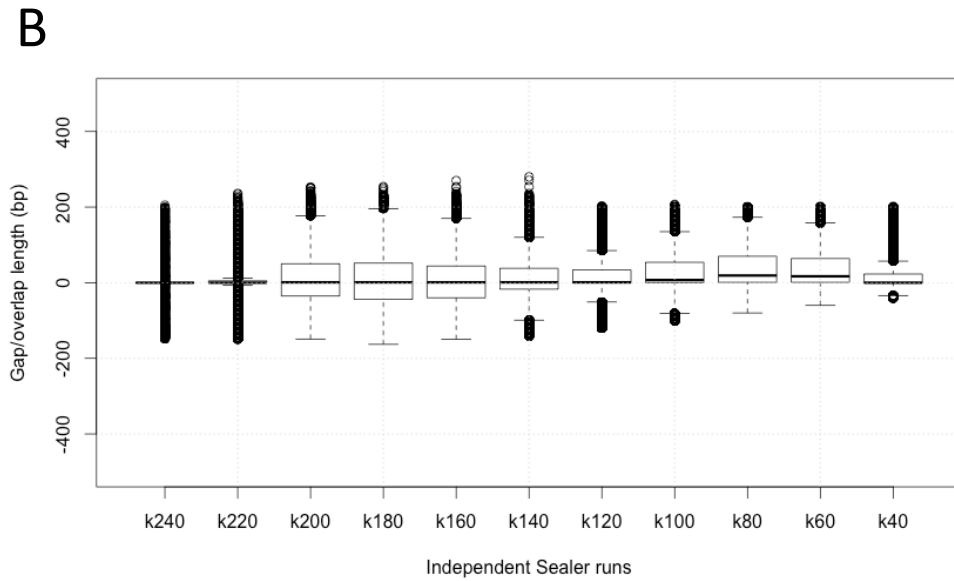

**Supplemental figure S3. Individual Sealer *H. sapiens* runs at unique values of  $-k$  and  $-P$ .** A) Gap closing yield as a function of  $k$  and varying with the maximum number of path allowed. B) gap size distribution for individual Sealer runs at unique values of  $k$ .
