# Supplementary material for: Sealer: a scalable gap-closing application for finishing draft genomes
Source: PubMed Central journal article supplement (PMC4515008; doi:10.1186/s12859-015-0663-4), 2015-07-25
Supplement: 12859_2015_663_MOESM6_ESM.pdf [file 12859_2015_663_MOESM6_ESM.pdf]

**Supplemental table S3.** Closing gaps in a human genome draft assembly using Sealer with different  $k$  value ranges.

|                                      | Run 1<br>( $k=250 - 120$ , step 10) | Run 2<br>( $k=125 - 40$ , step 5) | Run 1 + Run 2<br>combined |
|--------------------------------------|-------------------------------------|-----------------------------------|---------------------------|
| Number of gaps closed                | 58,432                              | 62,244                            | 120,676                   |
| % closed                             | 24.6                                | 26.2                              | 50.8                      |
| Average gap size<br>( $\pm$ S.D. bp) | $5.55 \pm 72.73$                    | $55.72 \pm 73.77$                 | $31.58 \pm 77.40$         |
| Longest gap closed<br>(bp)           | 195                                 | 403                               | 403                       |
| Longest overlap<br>closed (bp)       | 149                                 | 125                               | 149                       |
